# Supplementary material for: Structure and magnetism of decanuclear and octadecanuclear manganese(II/III) triethanolamine clusters
Source: Royal Society of Chemistry journal article supplement (doi:10.1039/b814407a), 2008-12-12
Supplement: b814407a.pdf [file b814407a.pdf]

†Electronic Supplementary Information (ESI)

**Decanuclear and Octadecanuclear Manganese(II/III)-  
Triethanolamine Single Molecule Magnets<sup>†</sup>**

Stuart K. Langley,<sup>a</sup> Kevin J. Berry,<sup>b</sup> Boujemaa Moubaraki<sup>a</sup> and Keith S. Murray<sup>\*a</sup>

School of Chemistry, Monash University, Australia 3800.

**Table S1.** Bond valence sums for complex **1**. The oxidation state for each metal is the whole number closest to the value in bold.

| Atoms | Mn(II)      | Mn(III)     | Mn(IV) |
|-------|-------------|-------------|--------|
| Mn1   | <b>1.98</b> | 1.84        | 1.80   |
| Mn2   | 3.28        | <b>3.01</b> | 2.96   |
| Mn3   | 3.41        | <b>3.12</b> | 3.07   |
| Mn4   | <b>1.97</b> | 1.84        | 1.81   |
| Mn5   | 3.31        | <b>3.06</b> | 3.03   |
| Mn6   | <b>1.80</b> | 1.65        | 1.62   |
| Mn7   | 3.36        | <b>3.09</b> | 3.05   |
| Mn8   | 3.39        | <b>3.11</b> | 3.06   |
| Mn9   | 3.39        | <b>3.12</b> | 3.06   |
| Mn10  | <b>1.98</b> | 1.86        | 1.79   |

**Table S2.** Selected bond lengths (Å) for complex **1**.

|         |          |         |          |         |          |          |          |
|---------|----------|---------|----------|---------|----------|----------|----------|
| Mn1-O2  | 2.167(4) | Mn3-O14 | 2.080(5) | Mn6-O22 | 2.055(4) | Mn9-O22  | 1.862(4) |
| Mn1-O3  | 2.183(5) | Mn3-O13 | 2.098(5) | Mn6-O8  | 2.066(4) | Mn9-O32  | 1.902(4) |
| Mn1-O6  | 2.256(4) | Mn3-O12 | 2.104(6) | Mn6-O23 | 2.077(4) | Mn9-O31  | 2.018(6) |
| Mn1-O5  | 2.310(5) | Mn4-O16 | 2.170(5) | Mn6-N5  | 2.229(6) | Mn9-O28  | 2.028(5) |
| Mn1-O4  | 2.328(6) | Mn4-O15 | 2.183(5) | Mn7-O23 | 1.842(4) | Mn9-O30  | 2.087(5) |
| Mn1-N1  | 2.339(6) | Mn4-O17 | 2.283(6) | Mn7-O2  | 1.915(4) | Mn9-O29  | 2.190(5) |
| Mn1-N2  | 2.388(6) | Mn4-O18 | 2.284(5) | Mn7-O7  | 2.060(5) | Mn10-O32 | 2.156(5) |
| Mn2-O8  | 1.860(4) | Mn4-O14 | 2.285(6) | Mn7-O24 | 2.072(5) | Mn10-O33 | 2.210(5) |
| Mn2-O3  | 1.919(4) | Mn4-N3  | 2.336(6) | Mn7-O25 | 2.085(6) | Mn10-O35 | 2.277(5) |
| Mn2-O9  | 2.051(6) | Mn4-N4  | 2.371(6) | Mn7-O6  | 2.143(4) | Mn10-O34 | 2.282(6) |
| Mn2-O10 | 2.099(5) | Mn5-O22 | 1.843(4) | Mn8-O23 | 1.852(4) | Mn10-O29 | 2.290(4) |
| Mn2-O7  | 2.115(5) | Mn5-O16 | 1.908(4) | Mn8-O33 | 1.915(4) | Mn10-N6  | 2.350(7) |
| Mn2-O6  | 2.155(5) | Mn5-O20 | 2.056(6) | Mn8-O27 | 2.033(5) | Mn10-N7  | 2.362(6) |
| Mn3-O8  | 1.846(4) | Mn5-O13 | 2.076(5) | Mn8-O29 | 2.060(5) |          |          |
| Mn3-O15 | 1.914(5) | Mn5-O21 | 2.081(5) | Mn8-O26 | 2.109(5) |          |          |
| Mn3-O11 | 2.039(5) | Mn5-O14 | 2.183(6) | Mn8-O28 | 2.111(5) |          |          |

**Table S3.** Bond valence sums for complex **2**. The oxidation state for each metal is the whole number closest to the value in bold.

| Atoms | Mn(II)      | Mn(III)     | Mn(IV) |
|-------|-------------|-------------|--------|
| Mn1   | <b>2.16</b> | 2.04        | 1.98   |
| Mn2   | 3.40        | <b>3.16</b> | 3.08   |
| Mn3   | 3.32        | <b>3.07</b> | 3.02   |
| Mn4   | 3.44        | <b>3.18</b> | 3.12   |
| Mn5   | 3.25        | <b>3.01</b> | 2.96   |
| Mn6   | 3.42        | <b>3.16</b> | 3.11   |
| Mn7   | 3.39        | <b>3.14</b> | 3.08   |
| Mn8   | <b>1.90</b> | 1.77        | 1.74   |
| Mn9   | 3.35        | <b>3.13</b> | 3.07   |
| Mn10  | <b>2.10</b> | 1.99        | 1.94   |
| Mn11  | 3.35        | <b>3.07</b> | 3.01   |
| Mn12  | 3.27        | <b>3.03</b> | 2.97   |
| Mn13  | 3.42        | <b>3.23</b> | 3.18   |
| Mn14  | 3.32        | <b>3.08</b> | 3.03   |
| Mn15  | 3.09        | <b>2.91</b> | 2.87   |
| Mn16  | 3.34        | <b>3.12</b> | 3.07   |
| Mn17  | 3.50        | <b>3.22</b> | 3.16   |
| Mn18  | 3.31        | <b>3.10</b> | 2.95   |

**Table S4.** Selected bond lengths (Å) for complex **1**

|          |          |         |          |          |          |          |          |
|----------|----------|---------|----------|----------|----------|----------|----------|
| Mn1-O3   | 2.105(5) | Mn4-N8  | 2.481(3) | Mn9-O28  | 2.203(2) | Mn14-N34 | 1.956(3) |
| Mn1-O2   | 2.141(3) | Mn5-O16 | 1.892(2) | Mn9-N5   | 2.343(3) | Mn14-O28 | 1.981(2) |
| Mn1-N2   | 2.248(3) | Mn5-O13 | 1.925(3) | Mn10-O27 | 2.117(2) | Mn14-O19 | 2.256(3) |
| Mn1-O1   | 2.296(3) | Mn5-O11 | 1.935(3) | Mn10-O7  | 2.195(3) | Mn14-N27 | 2.469(2) |
| Mn1-O5   | 2.301(2) | Mn5-O12 | 2.108(2) | Mn10-O6  | 2.214(2) | Mn15-O27 | 1.850(2) |
| Mn1-O4   | 2.303(4) | Mn5-O14 | 2.210(3) | Mn10-O21 | 2.219(3) | Mn15-O32 | 1.959(3) |
| Mn1-N1   | 2.306(3) | Mn5-N11 | 2.354(3) | Mn10-N19 | 2.309(3) | Mn15-O31 | 1.969(3) |
| Mn1a-O1  | 1.782(4) | Mn5-O15 | 2.519(2) | Mn10-N16 | 2.349(3) | Mn15-O28 | 1.994(2) |
| Mn1a-O3a | 2.193(5) | Mn6-O15 | 1.872(2) | Mn10-O20 | 2.369(3) | Mn15-N33 | 2.394(3) |
| Mn1a-N2  | 2.253(4) | Mn6-O9  | 1.918(2) | Mn11-O16 | 1.919(2) | Mn15-N16 | 2.413(3) |
| Mn1a-O5  | 2.300(4) | Mn6-O22 | 1.930(2) | Mn11O29  | 1.926(3) | Mn16-O27 | 1.836(3) |
| Mn1a-N1  | 2.337(4) | Mn6-O10 | 1.951(2) | Mn11-O17 | 1.957(2) | Mn16-O29 | 1.941(3) |
| Mn1a-O2  | 2.602(4) | Mn6-O12 | 2.144(2) | Mn11N20  | 1.959(3) | Mn16-N30 | 1.965(3) |
| Mn2-O7   | 1.874(2) | Mn6-N12 | 2.390(3) | Mn11-O14 | 2.220(2) | Mn16-O17 | 2.014(2) |
| Mn2-O5   | 1.904(2) | Mn7-O12 | 1.868(2) | Mn11-O24 | 2.331(2) | Mn16-O30 | 2.217(2) |
| Mn2-O6   | 1.914(2) | Mn7-O20 | 1.923(2) | Mn12-O16 | 1.890(2) | Mn16-O20 | 2.318(2) |
| Mn2-N2   | 1.991(3) | Mn7-O17 | 1.967(2) | Mn12-O25 | 1.930(2) | Mn17-O22 | 1.900(2) |
| Mn2-N5   | 2.332(3) | Mn7-O6  | 2.121(2) | Mn12-O15 | 2.007(2) | Mn17-O28 | 1.913(2) |
| Mn2-N8   | 2.418(3) | Mn7-N8  | 2.128(3) | Mn12-O26 | 2.153(2) | Mn17-O30 | 1.916(2) |
| Mn3-O1   | 1.886(3) | Mn7-O14 | 2.143(3) | Mn12-O24 | 2.223(2) | Mn17-O24 | 1.980(2) |
| Mn3-O8   | 1.896(2) | Mn8-O23 | 2.080(2) | Mn12-N23 | 2.246(3) | Mn17-O17 | 2.094(2) |
| Mn3-O5   | 1.928(2) | Mn8-O8  | 2.155(3) | Mn12-O22 | 2.286(2) | Mn17-N27 | 2.299(3) |
| Mn3-O9   | 1.963(2) | Mn8-O18 | 2.260(3) | Mn13-O23 | 1.845(2) | Mn18-O26 | 1.889(3) |
| Mn3-O10  | 2.302(2) | Mn8-O9  | 2.263(2) | Mn13-O25 | 1.934(2) | Mn18-O15 | 1.921(2) |
| Mn3-N5   | 2.366(3) | Mn8-O19 | 2.324(2) | Mn13-O22 | 1.950(2) | Mn18-N37 | 1.942(4) |
| Mn4-O2   | 1.872(3) | Mn8-N15 | 2.334(3) | Mn13-N24 | 1.968(3) | Mn18-N40 | 1.985(3) |
| Mn4-O11  | 1.891(3) | Mn9-O6  | 1.899(2) | Mn13-N12 | 2.310(3) | Mn18-O13 | 2.120(3) |
| Mn4-O5   | 1.909(3) | Mn9-O9  | 1.937(2) | Mn13-N27 | 2.344(3) |          |          |
| Mn4-O12  | 1.920(2) | Mn9-O19 | 1.952(2) | Mn14-O23 | 1.857(2) |          |          |
| Mn4-O10  | 2.255(2) | Mn9-N16 | 1.974(3) | Mn14-O31 | 1.945(2) |          |          |

**Figure S1.** Observed (red squares) and calculated (black diamonds) magnetisation isotherm values (y-axis in  $N\beta$ ) for the  $Mn_{10}$  cluster **1** in fields up to 50,000 Oe (5 T) (x-axis) at 2 K. See the script and the equations in Scheme S1 for the model using  $g = 2.0$ , and spin states  $S = 10, 11, 12, 13, 14, 9$  with energies: 0, 1, 3, 6, 9, 1  $cm^{-1}$ . No zero field splitting is included.

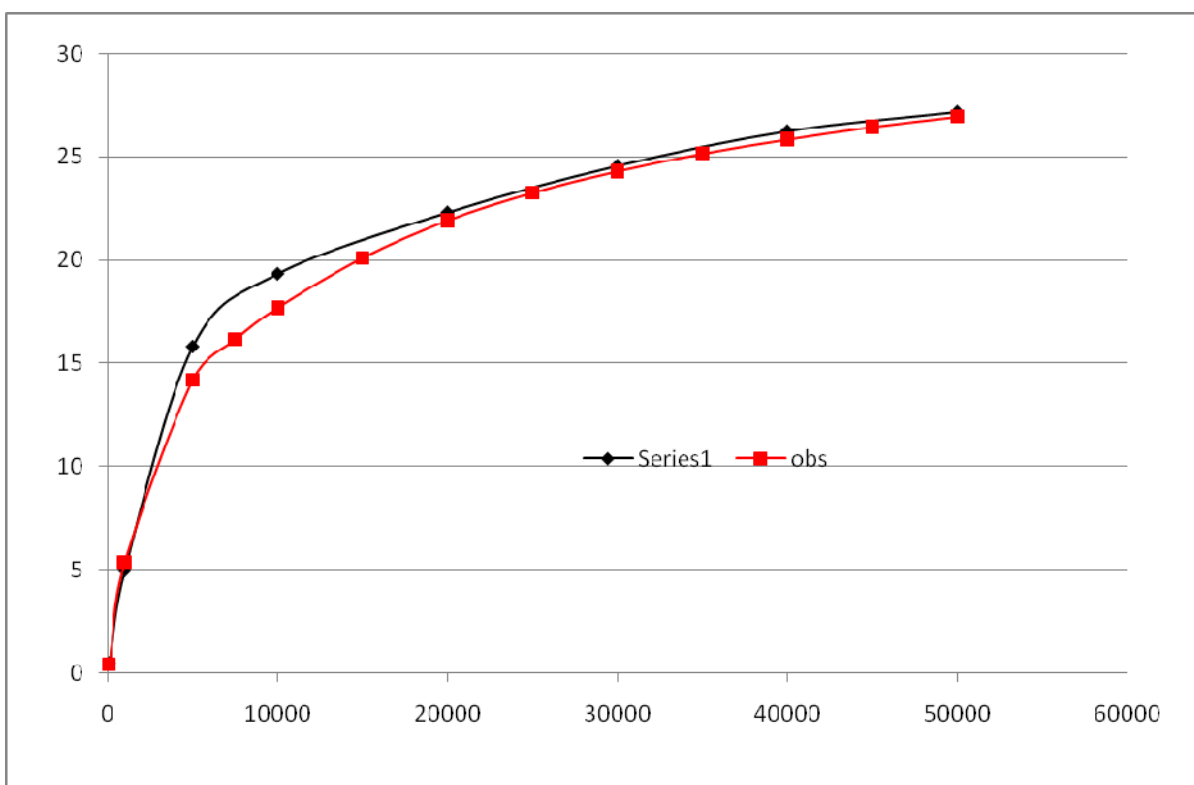

**Figure S2** Observed (red squares) and calculated (black diamonds) magnetisation isotherm values (y-axis in  $N\beta$ ) for the  $Mn_{10}$  cluster **1** in fields up to 50,000 Oe (5 T) (x-axis) at 3 K. See the script and the equations in Scheme S1 for the model using  $g = 2.0$ , and spin states  $S = 10, 11, 12, 13, 14, 9$  with energies: 0, 1, 3, 6, 9, 1  $cm^{-1}$ . No zero field splitting is included.

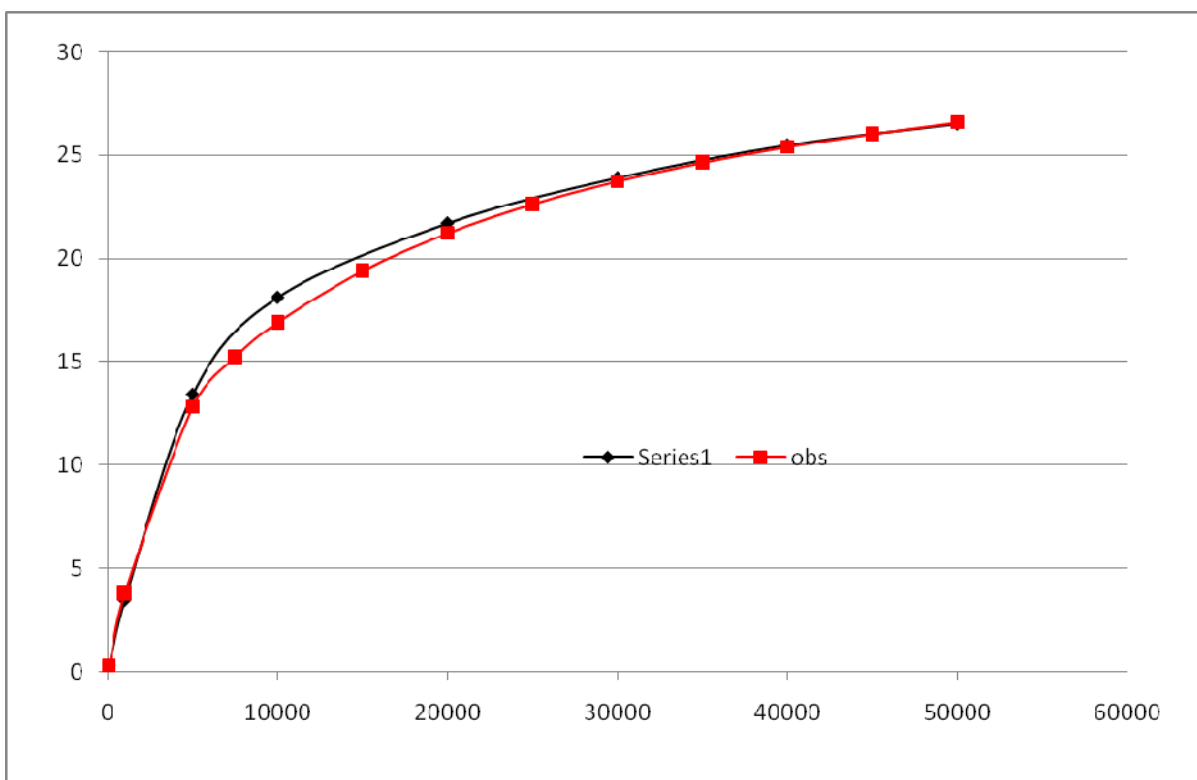

**Figure S3** Observed (red squares) and calculated (black diamonds) magnetisation isotherm values (y-axis in  $N\beta$ ) for the  $Mn_{10}$  cluster **1** in fields up to 50,000 Oe (5 T) (x-axis) at 4 K. See the script and the equations in Scheme S1 for the model using  $g = 2.0$ , and spin states  $S = 10, 11, 12, 13, 14, 9$  with energies: 0, 1, 3, 6, 9, 1  $cm^{-1}$ . No zero field splitting is included.

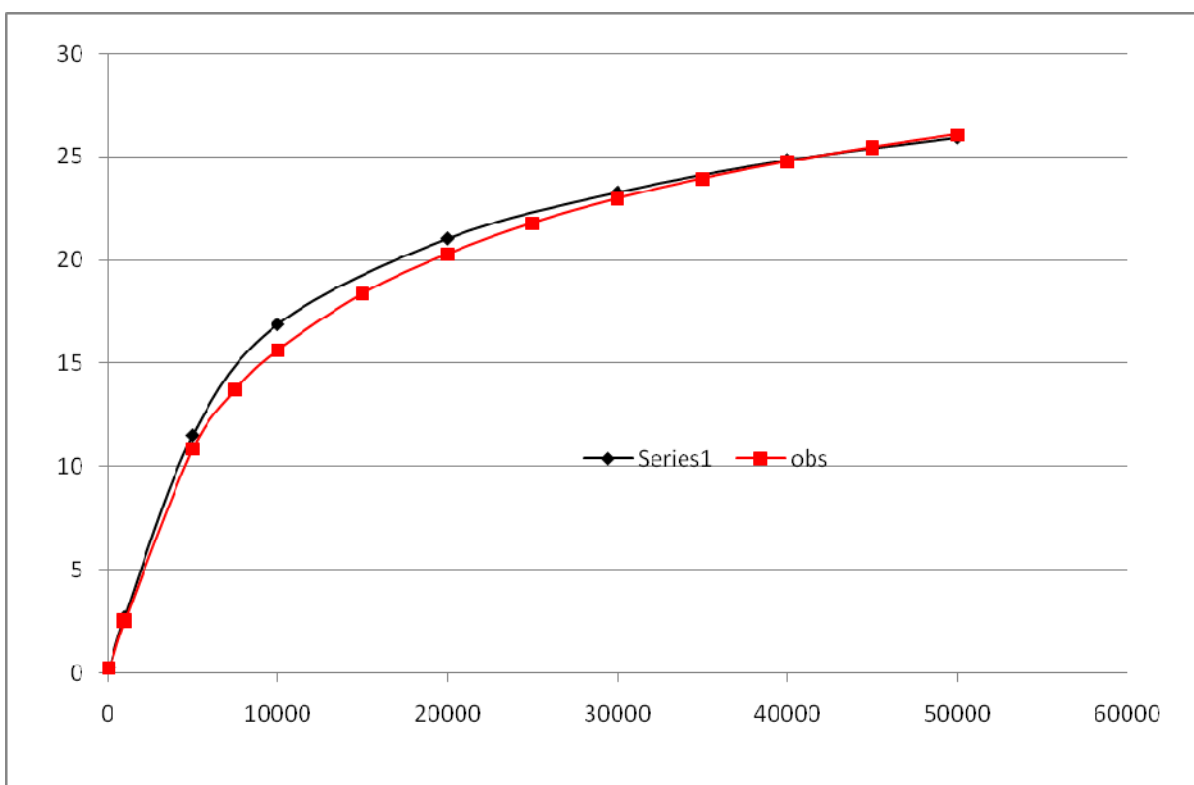

**Figure S4** Observed (red squares) and calculated (black diamonds) magnetisation isotherm values (y-axis in  $N\beta$ ) for the  $Mn_{10}$  cluster **1** in fields up to 50,000 Oe (5 T) (x-axis) at 5.5 K. See the script and the equations in Scheme S1 for the model using  $g = 2.0$ , and spin states  $S = 10, 11, 12, 13, 14, 9$  with energies: 0, 1, 3, 6, 9, 1  $cm^{-1}$ . No zero field splitting is included.

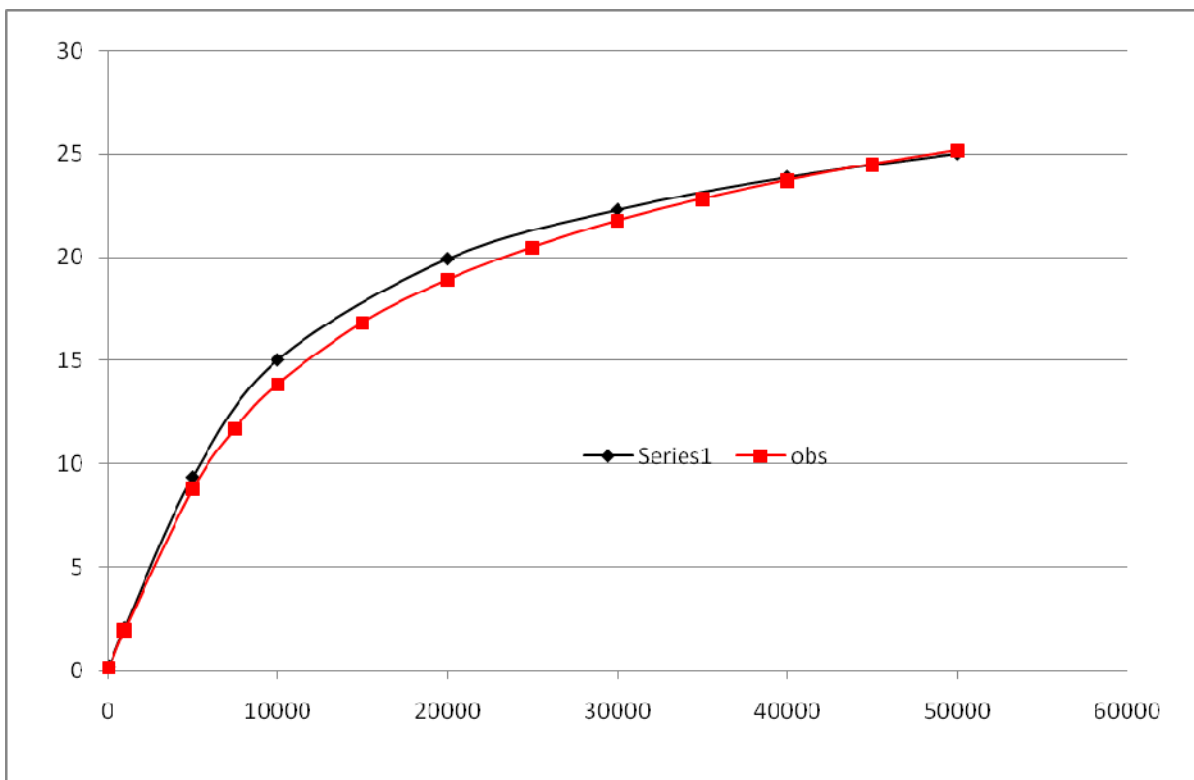

**Figure S5** Observed (red squares) and calculated (black diamonds) magnetisation isotherm values (y-axis in  $N\beta$ ) for the  $Mn_{10}$  cluster **1** in fields up to 50,000 Oe (5 T) (x-axis) at 10 K. See the script and the equations in Scheme S1 for the model using  $g = 2.0$ , and spin states  $S = 10, 11, 12, 13, 14, 9$  with energies: 0, 1, 3, 6, 9, 1  $cm^{-1}$ . No zero field splitting is included. See the script for probable reasons for divergence between observed and calculated curves.

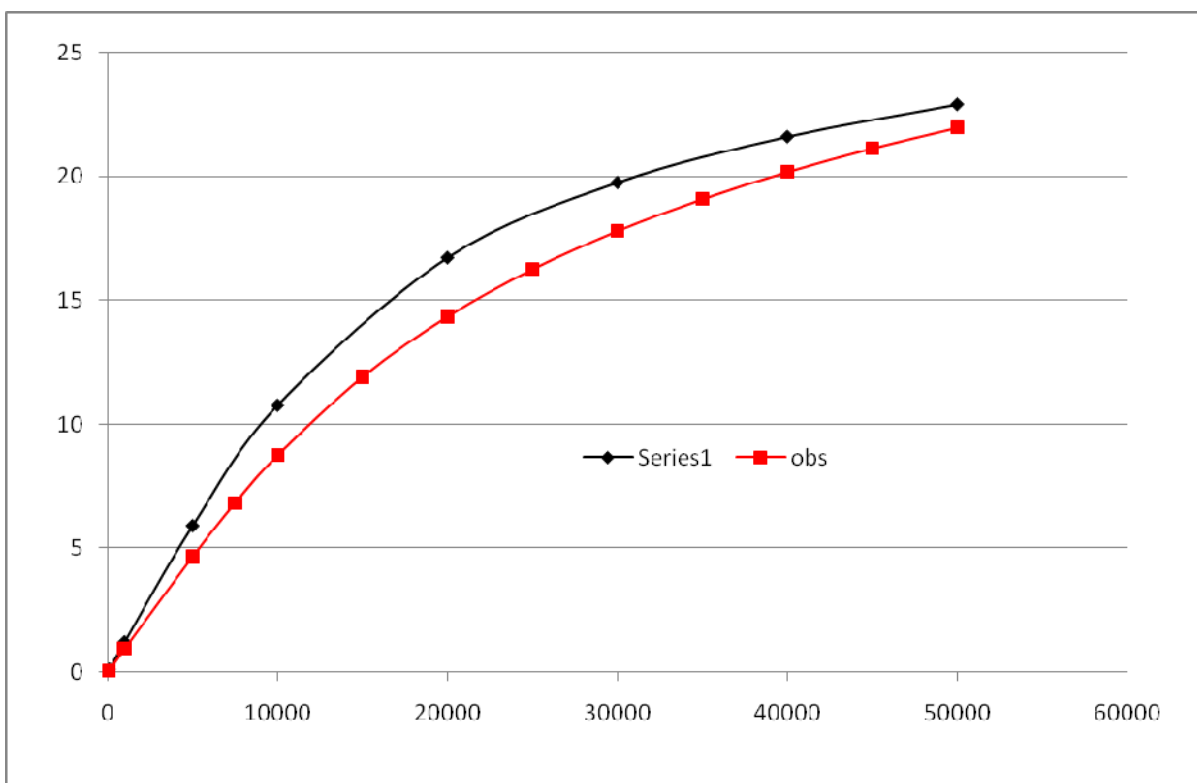



**Figure S6** Observed (red squares) and calculated (black diamonds) magnetisation isotherm values (y-axis in  $N\beta$ ) for the  $Mn_{10}$  cluster **1** in fields up to 50,000 Oe (5 T) (x-axis) at 20 K. See the script and the equations in Scheme S1 for the model using  $g = 2.0$ , and spin states  $S = 10, 11, 12, 13, 14, 9$  with energies: 0, 1, 3, 6, 9, 1  $cm^{-1}$ . No zero field splitting is included. See the script for probable reasons for divergence between observed and calculated curves.

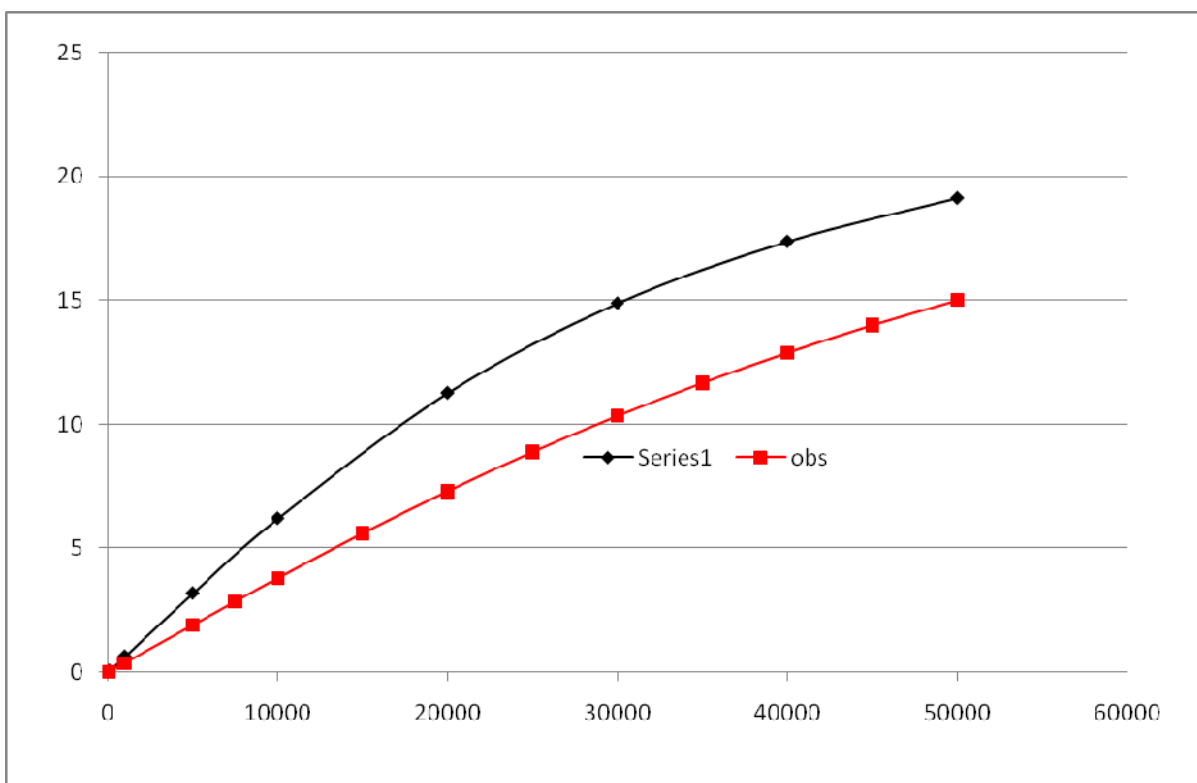

**Figure S7** Observed magnetisation values,  $M$ , in  $N\beta$  (orange squares) for the  $\text{Mn}_{18}$  cluster, **2**, in a field of 0.1 T (1000 Oe), at temperatures between 2 to 20 K. The blue line is that calculated for  $M$  using the model given in the script and equations in Scheme S1. It assumes an isolated  $S = 21/2$  state and  $g = 1.97$ . The calculations were carried out at 2, 3, 4, 5.5, 10 & 20K.

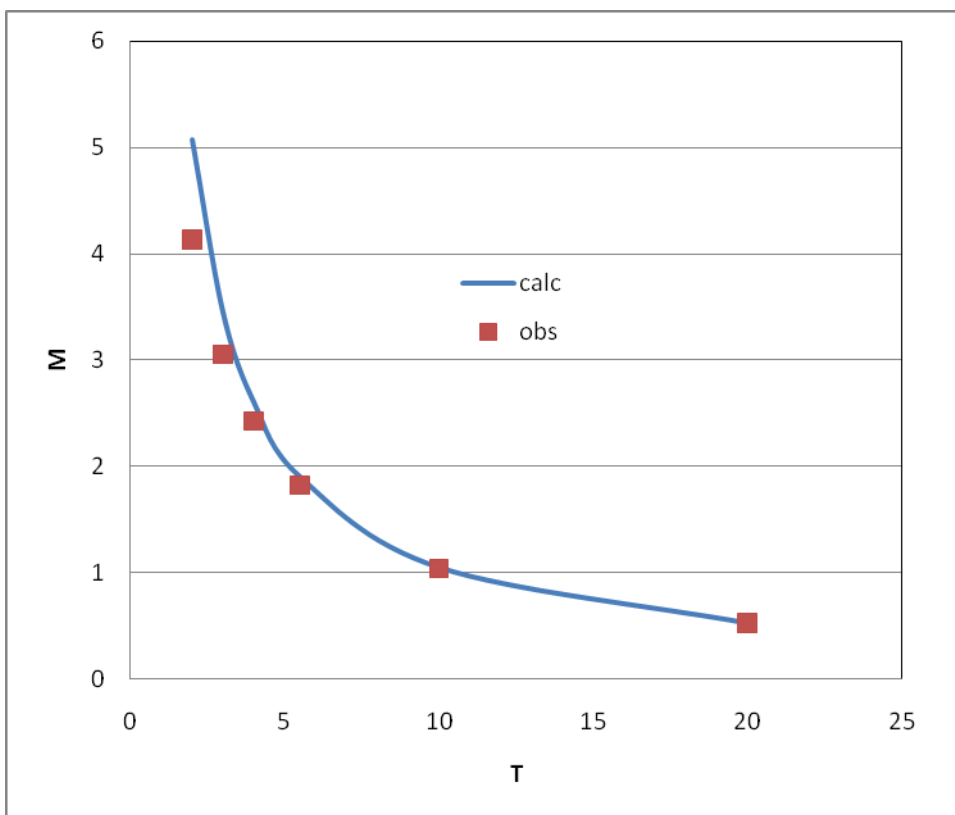

**Figure S8.** Observed (red squares) and calculated (black diamonds) magnetisation isotherm values (y-axis in  $N\beta$ ) for the  $Mn_{18}$  cluster **2** in fields up to 50,000 Oe (5 T) (x-axis) at 2 K. See the script and the equations in Scheme S1 for the model using  $g = 2.0$ , and single  $S$  states from 17/2 through to 35/2 with energies: 1, 0, 0, 1, 3, 5, 8, 12, 16, 22  $cm^{-1}$ . This is an exploratory calculation and degeneracies are not included. No zero field splitting is included. For the above energies the respective lowest energy levels ( $S$  in parentheses) are: 1 T and below (21/2), 2 T (23/2), 3 T(27/2), 4 T(29/2) and 5 T(33/2)

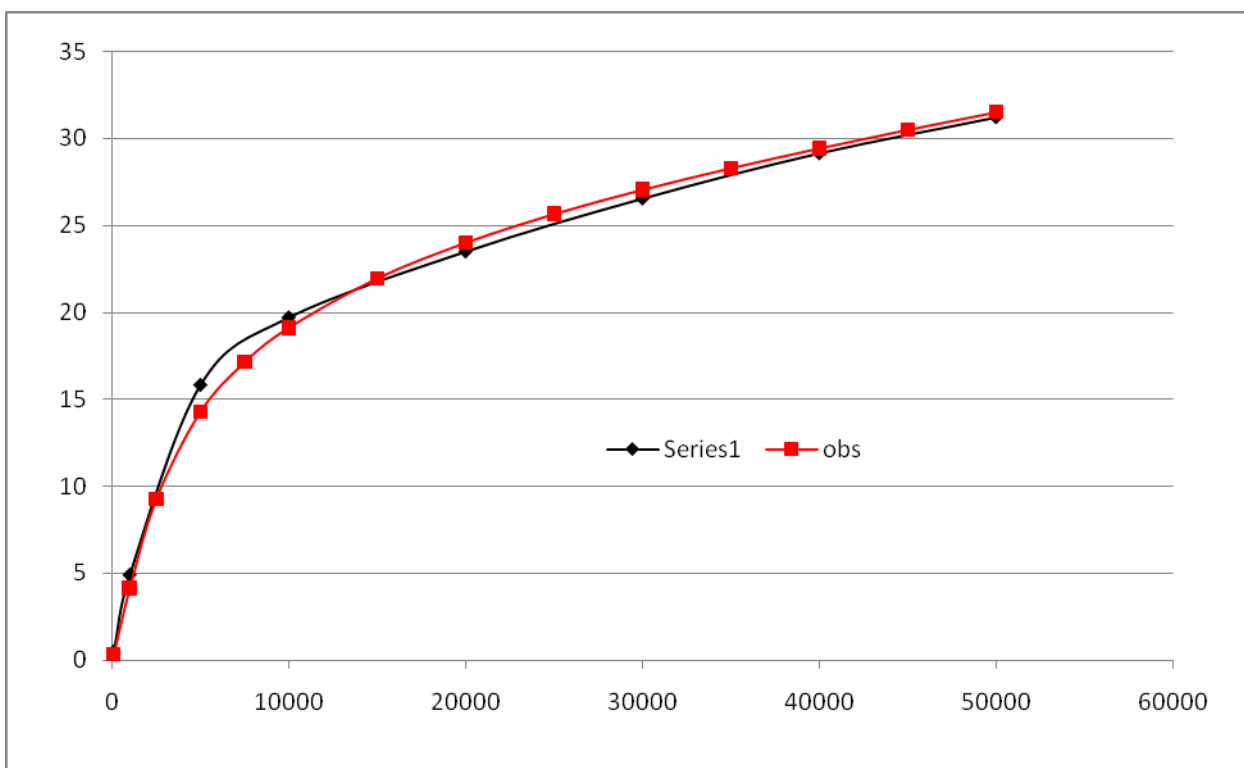

**Scheme S1** The energies of the Zeeman  $M_S$  levels (for spin state  $S$ ) and the magnetization,  $M$ , are calculated for clusters **1** and **2** using the equation given and the thermodynamic equation for  $M$  given.

$$E(M_S) = E + M_S g \beta H$$

$$M = -N\beta \frac{\sum_{-M}^{+M} \sum M_s g e^{-E(M_s / kT)}}{\sum_{-M}^{+M} \sum e^{-E(M_s / kT)}}$$
